# Supplementary material
Source: PubMed Central journal article supplement (PMC2638053)
Supplement: supp_180_4_400_v2_1.pdf [file supp_180_4_400_v2_1.pdf]

**Appendix 1** (as supplied by the authors): Decrement in utility for health states in the economic model

| Health state                                                   | Decrement* | Measurement technique                     |
|----------------------------------------------------------------|------------|-------------------------------------------|
| Myocardial infarction, year of event <sup>1</sup>              | -0.0409222 | EuroQol-5D                                |
| Myocardial infarction, subsequent yrs <sup>2</sup>             | -0.012     | EuroQol-5D                                |
| Angina, year of event <sup>1</sup>                             | -0.0411989 | EuroQol-5D                                |
| Angina, subsequent yrs <sup>1</sup>                            | -0.024     | EuroQol-5D                                |
| Congestive heart failure, year of event <sup>2</sup>           | -0.0546    | EuroQol-5D                                |
| Congestive heart failure, subsequent yrs <sup>2</sup>          | -0.018     | EuroQol-5D                                |
| Stroke, year of event <sup>1</sup>                             | -0.0523513 | EuroQol-5D                                |
| Stroke, subsequent yrs <sup>1</sup>                            | -0.040     | EuroQol-5D                                |
| Peripheral vascular disease <sup>3</sup>                       | -0.021     | EuroQol-5D                                |
| Microalbuminuria <sup>4</sup>                                  | -0.012     | EuroQol-5D                                |
| Gross proteinuria <sup>5</sup>                                 | -0.017     | Quality of well being — self administered |
| Dialysis <sup>6,7,8</sup>                                      | -0.16      | EuroQol-5D                                |
| Functioning kidney transplant <sup>6,7,8</sup>                 | -0.03      | Standard gamble                           |
| Diabetic retinopathy <sup>1</sup>                              | -0.0155836 | EuroQol-5D                                |
| Blindness and low Vision <sup>1</sup>                          | -0.0497859 | EuroQol-5D                                |
| Cataract <sup>1</sup>                                          | -0.0170832 | EuroQol-5D                                |
| Macular edema <sup>1</sup>                                     | -0.0170832 | EuroQol-5D                                |
| Neuropathy <sup>1</sup>                                        | -0.0243702 | EuroQol-5D                                |
| Active uninfected diabetic ulcer <sup>9</sup>                  | -0.09      | Time trade off                            |
| Active infected diabetic ulcer <sup>9</sup>                    | -0.14      | Time trade off                            |
| Amputation <sup>10</sup>                                       | -0.266     | EuroQol-5D                                |
| Severe hypoglycemic episode requiring assistance <sup>11</sup> | -0.5485    | EuroQol-5D                                |
| Mild/moderate hypoglycemic episode <sup>11</sup>               | -0.167     | EuroQol-5D                                |

\*Applied for 1-year, except for hypoglycemic episodes and ulcers

**References**

1. Consumer price index. The Daily. Ottawa (ON). Statistics Canada; 2008. Available: [www.statcan.ca/Daily/English/080219/d080219a.htm](http://www.statcan.ca/Daily/English/080219/d080219a.htm) (accessed 2008 Jun. 20).
2. Drummond MF, Sculpher MJ, Torrance GW, et al. *Methods for the economic evaluation of health care programmes*. 3rd ed. Oxford (UK): Oxford University Press; 2005.
3. Manns B, Johnson JA, Taub K, et al. Quality of life in patients with end-stage renal disease over time: the impact of dialysis modality and other important determinants [working paper 02-05]. Edmonton (AB): Institute of Pharmaco-Economics; 2002 Available: [www.ihe.ca/documents/2002-05paper.pdf](http://www.ihe.ca/documents/2002-05paper.pdf) (accessed 2007 Jul 23).
4. Redekop WK, Koopmanschap MA, Stolk RP, et al. Health-related quality of life and treatment satisfaction in Dutch patients with type 2 diabetes. *Diabetes Care* 2002;25:458-63.
5. *EQ-5D: a standardised instrument for use as a measure of health outcome*. Rotterdam (The Netherlands): Euroqol; 2007. Available: [www.euroqol.org](http://www.euroqol.org) (accessed 2008 Nov. 27).
6. Caro J, Migliaccio-Walle K, Ishak KJ, et al. The morbidity and mortality following a diagnosis of peripheral arterial disease: long-term follow-up of a large database. *BMC Cardiovasc Disord* 2005;5:14.
7. O'Brien JA, Patrick AR, Caro JJ. Cost of managing complications resulting from type 2 diabetes mellitus in Canada. *BMC Health Serv Res* 2003;3:7.
8. Kiberd BA, Larson T. Estimating the benefits of solitary pancreas transplantation in nonuremic patients with type 1 diabetes mellitus: a theoretical analysis. *Transplantation* 2000;70:1121-7.
9. Redekop WK, Stolk EA, Kok E, et al. Diabetic foot ulcers and amputations: estimates of health utility for use in cost-effectiveness analyses of new treatments. *Diabetes Metab* 2004;30:549-56.
10. Clarke P, Gray A, Holman R. Estimating utility values for health states of type 2 diabetic patients using the EQ-5D (UKPDS 62). *Med Decis Making* 2002;22:340-9.
11. Sullivan PW, Ghushchyan V. Preference-based EQ-5D index scores for chronic conditions in the United States. *Med Decis Making* 2006;26:410-20.
