# Supplementary material
Source: PubMed Central journal article supplement (PMC2638053)
Supplement: supp_180_4_400_v2_2.pdf [file supp_180_4_400_v2_2.pdf]

## Appendix 2 (as supplied by the authors): Cost-effectiveness thresholds

When interpreting the incremental cost per quality-adjusted life-year ratio, one must consider the maximum that a decision maker is willing to pay for one quality-adjusted life year gained. In Canada, there is not a cost-effectiveness threshold per se, but rather a range of incremental cost per quality-adjusted life-year values, which, when considered in the context of a decision maker's priorities and the interventions' place in therapy, may be considered acceptable.

Consequently, cost-effectiveness thresholds may differ under different scenarios. For instance, decision makers may be more willing to accept a higher incremental per quality-adjusted life-year value for a new treatment for which no other treatments are available.<sup>1</sup> In contrast, interventions with a large budget impact may be subject to a lower threshold.<sup>2</sup> Use of cost-effectiveness thresholds in healthcare resource allocation decisions is controversial, as estimates are not based on empirical evidence.<sup>3,4</sup>

Nevertheless, use of cost-effectiveness thresholds to guide adoption and funding decisions on healthcare technologies is widespread.<sup>1,5,6</sup> The National Institute of Clinical Excellence (NICE) in the United Kingdom uses a cost-effectiveness threshold range of £20,000 to £30,000 per QALY gained.<sup>1,5,6</sup> Other estimates include a value of \$50,000 per quality-adjusted life-year in the US,<sup>8</sup> a value of \$52,400<sup>9</sup> per quality-adjusted life-year in the Australian benefits scheme, and a range of \$20,000-\$100,000<sup>10</sup> per quality-adjusted life-years reported in Canada. Some argue that these cost-effectiveness threshold estimates may be too high, and are contributing to escalating healthcare costs;<sup>3,6,11</sup> others argue that they are too low.<sup>12,13</sup>

### References

1. Rawlins MD, Culyer AJ. National Institute for Clinical Excellence and its value judgments. *BMJ* 2004;329(7459):224-7.
2. McCabe C, Claxton K, Culyer AJ. The NICE cost-effectiveness threshold: what it is and what that means. *Pharmacoeconomics* 2008;26(9):733-44.
3. Birch S, Gafni A. Information created to evade reality (ICER): things we should not look to for answers. *Pharmacoeconomics* 2006;24(11):1121-31.
4. Gafni A, Birch S. Incremental cost-effectiveness ratios (ICERs): the silence of the lambda. *Social Science & Medicine* 2006;62(9):2091-100.
5. Culyer A, McCabe C, Briggs A, Claxton K, Buxton M, Akehurst R, et al. Searching for a threshold, not setting one: the role of the National Institute for Health and Clinical Excellence. *J Health Serv Res Policy* 2007;12(1):56-8.
6. Claxton K, Briggs A, Buxton MJ, Culyer AJ, McCabe C, Walker S, et al. Value based pricing for NHS drugs: an opportunity not to be missed? *BMJ* 2008;336(7638):251-4.
7. Gross domestic product 2007. In: *World development indicators database*. Washington, DC: World Bank; 2008. Available:

<http://siteresources.worldbank.org/DATASTATISTICS/Resources/GDP.pdf> (accessed 2008 Aug 21).

8. Hirth RA, Chernew ME, Miller E, Fendrick AM, Weissert WG. Willingness to pay for a quality-adjusted life year: in search of a standard. *Med Decis Making* 2000;20(3):332-42.
9. Zhang P, Engलगau MM, Norris SL, Gregg EW, Narayan KMV. Application of economic analysis to diabetes and diabetes care. *Ann Intern Med* 2004;140(11):972-7. Available: <http://www.annals.org/cgi/reprint/140/11/972.pdf> (accessed 2008 Jan 29).
10. Laupacis A, Feeny D, Detsky AS, Tugwell PX. How attractive does a new technology have to be to warrant adoption and utilization? Tentative guidelines for using clinical and economic evaluations. *CMAJ* 1992;146(4):473-81.
11. Martin S, Rice N, Smith PC. *The link between healthcare spending and health outcomes. Evidence from English programme budgeting data*. London (UK): The Health Foundation; 2007. Available: <http://www.health.org.uk/document.rm?id=175> (accessed 2008 Aug 21).
12. Ubel PA, Hirth RA, Chernew ME, Fendrick AM. What is the price of life and why doesn't it increase at the rate of inflation? *Arch Intern Med* 2003;163(14):1637-41.
13. Kingsbury K. The value of a human life: \$129,000. *Time* 2008;May 20. Available: <http://www.time.com/time/health/article/0,8599,1808049,00.html> (accessed 2008 Aug 21).
