# Supplementary material
Source: PubMed Central journal article supplement (PMC2638053)
Supplement: supp_180_4_400_v2_3.pdf [file supp_180_4_400_v2_3.pdf]

**Appendix 3** (as supplied by the authors): Results of sensitivity analyses for insulin analogues in the treatment of adults with diabetes in Canada, by type of diabetes and treatment comparison

| Comparison                                             | Fear of hypoglycemia |                                    |                                             | Difference in glycosylated hemoglobin% = 0 |                                    |                                             |
|--------------------------------------------------------|----------------------|------------------------------------|---------------------------------------------|--------------------------------------------|------------------------------------|---------------------------------------------|
|                                                        | Cost (Can\$)         | Difference                         |                                             | Cost (Can\$)                               | Difference                         |                                             |
|                                                        |                      | Quality adjusted life years gained | Cost per quality adjusted life years gained |                                            | Quality adjusted life years gained | Cost per quality adjusted life years gained |
| <b>Type 1 diabetes</b>                                 |                      |                                    |                                             |                                            |                                    |                                             |
| Insulin aspart v. regular human insulin                | -621                 | 0.212                              | cost-saving                                 | 174                                        | 0.002                              | 104 598                                     |
| Insulin lispro v. regular human insulin                | 182                  | 0.163                              | 1 117                                       | 271                                        | 0.0004                             | 673 041                                     |
| Insulin glargine v. insulin neutral protamine hagedorn | 3 423                | 0.199                              | 17 225                                      | 3 689                                      | 0.004                              | 916 401                                     |
| Insulin detemir v. insulin neutral protamine hagedorn  | 4 344                | 0.169                              | 25 666                                      | 4 288                                      | 0.002                              | 1 958 928                                   |
| <b>Type 2 diabetes</b>                                 |                      |                                    |                                             |                                            |                                    |                                             |
| Insulin aspart v. regular human insulin                | 333                  | 0.075                              | 4 429                                       | 749                                        | 0.001                              | 543 584                                     |
| Insulin lispro v. regular human insulin                | 784                  | 0.065                              | 12 115                                      | 1 092                                      | 0.014                              | 80 445†                                     |
| Insulin glargine v. insulin neutral protamine hagedorn | 4 945                | 0.067                              | 73 989                                      | 5 199                                      | 0.003                              | 1 577 457                                   |
| Insulin detemir v. insulin neutral protamine hagedorn  | 6 521                | 0.028                              | 234 606                                     | 6 287                                      | 0.007                              | 882 155                                     |

Note: †Counterintuitive incremental cost per quality adjusted life-year gained may be attributable to random variation of model iterations and small glycosylated hemoglobin% differences.
